# Supplementary material
Source: PubMed Central journal article supplement (PMC7724556)
Supplement: jama-e2022960-s003.pdf [file jama-e2022960-s003.pdf]

## Supplemental Online Content

Wilson AM, Clark AB, Cahn T, Chilvers ER, Fraser W, Hammond M, Livermore DM, Maher TM, Parfrey H, Swart AM, Stirling S, Thickett DR, Whyte M, . Effect of Co-Trimoxazole (Trimethoprim-Sulfamethoxazole) vs Placebo on Death, Lung Transplant, or Hospital Admission in Patients With Moderate and Severe Idiopathic Pulmonary Fibrosis. *JAMA*. Published online December 8, 2020.  
doi:10.1001/jama.2020.22960

**Supplement 3.** eTable 1. Dose modifications

eTable 2. Primary outcome and secondary outcomes for individual components of primary outcome

eTable 3. Per-protocol analysis of the lung function and questionnaire outcomes at 12 months

eTable 4. Modified per-protocol analysis of the lung function and questionnaire outcomes at 12 months

eTable 5. Cough score over time by randomisation arm

eTable 6. Adverse events

eTable 7. Summary of safety blood measures at 12 months

This supplemental material has been provided by the authors to give readers additional information about their work.

eTable 1 Dose modifications<sup>a</sup>

|                 | Co-trimoxazole         |                                  | Placebo                |                                  |
|-----------------|------------------------|----------------------------------|------------------------|----------------------------------|
|                 | Number of participants | Number (%) of dose modifications | Number of participants | Number (%) of dose modifications |
| 3 month visit   | 114                    | 19 (16.7%)                       | 137                    | 10 (7.3%)                        |
| 6 month visit   | 96                     | 7 (7.3%)                         | 113                    | 6 (5.3%)                         |
| 12 month visit  | 61                     | 4 (6.6%)                         | 78                     | 0                                |
| 18 month visit  | 38                     | 1 (2.6%)                         | 46                     | 0                                |
| 24 month visit  | 20                     | 0                                | 28                     | 0                                |
| 30 month visit  | 10                     | 0                                | 10                     | 0                                |
| 36 month visit  | 2                      | 0                                | 3                      | 0                                |
| Any dose change |                        | 31 (19%)                         |                        | 16 (9%)                          |

<sup>a</sup>This represents the reduction of study drug from 2 tablets twice a day, to 2 tablets once a day 3 times a week

eTable 2 Primary outcome and secondary outcomes for individual components of primary outcome

|                                                                 | Co-trimoxazole (N=169)      |                                                 | Placebo (N=172)             |                                                 |                                                                                                 |
|-----------------------------------------------------------------|-----------------------------|-------------------------------------------------|-----------------------------|-------------------------------------------------|-------------------------------------------------------------------------------------------------|
|                                                                 | Total exposure time (years) | Number of events to date (cumulative incidence) | Total exposure time (years) | Number of events to date (cumulative incidence) | Hazard Ratio (comparing co-trimoxazole to Placebo)                                              |
| Randomized group allocation analysis <sup>a</sup>               |                             |                                                 |                             |                                                 |                                                                                                 |
| Composite primary outcome                                       | 185.6                       | 84                                              | 209.1                       | 80                                              | Unadjusted<br>1.2 (0.9 to 1.6)<br>p=0.33<br>Adjusted <sup>1</sup><br>1.2 (0.9 to 1.6)<br>p=0.32 |
| Deaths censored at date of primary event (if primary not death) | 185.6                       | 24                                              | 209.1                       | 18                                              | Unadjusted<br>1.5 (0.8 to 2.8)<br>p=0.17<br>Adjusted<br>1.5 (0.8 to 2.8)<br>p=0.18              |
| Respiratory-related death (censored at time of primary event)   | 185.6                       | 20                                              | 209.1                       | 17                                              | Unadjusted<br>1.4 (0.7 to 2.6)<br>p=0.34<br>Adjusted<br>1.4 (0.7 to 2.6)<br>p=0.35              |
| Non-elective hospital admissions (all cause)                    | 185.6                       | 59                                              | 209.1                       | 61                                              | Unadjusted<br>1.1 (0.7 to 1.5)<br>p=0.75<br>Adjusted                                            |

|                                                                         |       |    |       |    |                                                                                                 |
|-------------------------------------------------------------------------|-------|----|-------|----|-------------------------------------------------------------------------------------------------|
|                                                                         |       |    |       |    | 1.1 (0.7 to 1.3)<br>p=0.73                                                                      |
| Respiratory-related hospitalisation (censored at time of primary event) | 185.6 | 40 | 209.1 | 42 | Unadjusted<br>1.0 (0.7 to 1.6)<br>p=0.86<br>Adjusted<br>1.0 (0.7 to 1.6)<br>p=0.83              |
| Lung transplant                                                         | 185.6 | 1  | 209.1 | 1  | Not analysed.                                                                                   |
| Per protocol analysis <sup>b</sup>                                      |       |    |       |    |                                                                                                 |
| Composite primary outcome                                               | 132.6 | 59 | 132.0 | 64 | Unadjusted<br>0.9 (0.7 to 1.3)<br>p=0.70<br>Adjusted <sup>1</sup><br>0.9 (0.7 to 1.3)<br>p=0.76 |
| Deaths censored at date of primary event (if primary not death)         | 132.6 | 13 | 132.0 | 12 | Unadjusted<br>1.1 (0.5 to 2.4)<br>p=0.82<br>Adjusted <sup>1</sup><br>1.1 (0.5 to 2.4)<br>p=0.81 |
| Respiratory-related death (censored at time of primary event)           | 132.7 | 12 | 132   | 11 | Unadjusted<br>1.1 (0.5 to 2.5)<br>p=0.82<br>Adjusted <sup>2</sup><br>1.1 (0.5 to 2.5)<br>p=0.82 |

|                                                                         |       |    |       |    |                                                                                                     |
|-------------------------------------------------------------------------|-------|----|-------|----|-----------------------------------------------------------------------------------------------------|
| Non-elective hospital admissions (all cause)                            | 132.6 | 45 | 132.0 | 51 | Unadjusted<br>1.1 (0.7 to 1.7)<br>p=0.58<br><br>Adjusted <sup>1</sup><br>0.9 (0.6 to 1.4)<br>p=0.64 |
| Respiratory-related hospitalisation (censored at time of primary event) | 132.6 | 29 | 132.0 | 35 | Unadjusted<br>0.8 (0.5 to 1.3)<br>p=0.45<br>Adjusted <sup>2</sup><br>0.8 (0.5 to 1.4)<br>p=0.49     |
| Modified per protocol analysis <sup>c</sup>                             |       |    |       |    |                                                                                                     |
| Composite primary outcome                                               | 92.5  | 44 | 123.7 | 62 | Unadjusted<br>0.9 (0.6 to 1.4)<br>p=0.41<br>Adjusted <sup>1</sup><br>0.9 (0.6 to 1.4)<br>p=0.77     |
| Deaths censored at date of primary event (if primary not death)         | 92.5  | 11 | 123.7 | 12 | Unadjusted<br>1.2 (0.5 to 2.8)<br>p=0.60<br>Adjusted <sup>1</sup><br>1.3 (0.6 to 2.9)<br>p=0.59     |
| Respiratory-related death (censored at                                  | 92.5  | 10 | 123.7 | 11 | Unadjusted<br>1.2 (0.5 to 2.9)<br>p=0.63                                                            |

|                                                                         |      |    |       |    |                                                                                                 |
|-------------------------------------------------------------------------|------|----|-------|----|-------------------------------------------------------------------------------------------------|
| time of primary event)                                                  |      |    |       |    | Adjusted <sup>1</sup><br>1.2 (0.5 to 2.9)<br>p=0.62                                             |
| Non-elective hospital admissions (all cause)                            | 92.5 | 32 | 123.7 | 49 | Unadjusted<br>0.9 (0.5 to 1.3)<br>p=0.49<br>Adjusted <sup>1</sup><br>0.9 (0.6 to 1.3)<br>p=0.51 |
| Respiratory-related hospitalisation (censored at time of primary event) | 92.5 | 23 | 123.7 | 34 | Unadjusted<br>0.9 (0.5 to 1.5)<br>p=0.64<br>Adjusted <sup>2</sup><br>0.9 (0.5 to 1.5)<br>p=0.66 |

<sup>a</sup> This is defined as all participants analysed in the group to which they were randomized <sup>b</sup>This is defined as people who adhered to at least 80% of the study medication <sup>c</sup>This is defined as people who adhered to at least 80% of the high dose regimen

eTable 3 Per-protocol<sup>a</sup> analysis of the lung function and questionnaire outcomes at 12 months.

| Outcome             | Co-trimoxazole |             | Placebo |             | Adjusted for site and baseline anti-fibrotic therapy |         | Adjusted for site, baseline anti-fibrotic therapy and baseline value |         |
|---------------------|----------------|-------------|---------|-------------|------------------------------------------------------|---------|----------------------------------------------------------------------|---------|
|                     | N              | Mean (SD)   | N       | Mean (SD)   | Mean difference (95% CI)                             | p-value | Mean difference (95% CI)                                             | p-value |
| Lung Function       |                |             |         |             |                                                      |         |                                                                      |         |
| Absolute            |                |             |         |             |                                                      |         |                                                                      |         |
| FVC (L)             | 48             | 2.21 (0.49) | 50      | 2.27 (0.52) | 0.05 (-0.16, 0.25)                                   | 0.65    | 0.04 (0.06, 0.14)                                                    | 0.42    |
| FEV1 (L)            | 48             | 1.83 (0.39) | 50      | 1.90 (0.42) | 0.08 (-0.08, 0.25)                                   | 0.33    | 0.03 (-0.05, 0.12)                                                   | 0.44    |
| DLCO (mmol/min/KPa) | 39             | 3.37 (1.92) | 40      | 3.69 (1.47) | 0.28 (-0.47, 1.03)                                   | 0.46    | 0.45 (-0.24, 1.15)                                                   | 0.20    |
| Percent predicted   |                |             |         |             |                                                      |         |                                                                      |         |
| FVC (%)             | 48             | 52.8 (8.7)  | 50      | 54.0 (9.4)  | 0.9 (-2.7, 4.5)                                      | 0.63    | 0.6 (-1.8, 3.0)                                                      | 0.62    |
| FEV1 (%)            | 48             | 56.5 (9.2)  | 50      | 59.2 (11.1) | 2.7 (-1.4, 6.8)                                      | 0.20    | 1.0 (-1.7, 3.6)                                                      | 0.48    |

|                                                                    |    |                         |    |                         |                        |      |                      |      |
|--------------------------------------------------------------------|----|-------------------------|----|-------------------------|------------------------|------|----------------------|------|
| DLCO (%)                                                           | 39 | 38.5(1<br>9.0)          | 40 | 42.2<br>(14.8)          | 3.5<br>(-4.1, 11.0)    | 0.37 | 5.8<br>(-1.7, 13.4)  | 0.13 |
| Medical Research Council dyspnea score <sup>b</sup> , Median (IQR) | 55 | 3.00<br>(2.00,<br>4.00) | 56 | 3.00<br>(2.00,<br>4.00) |                        | 0.84 |                      | 0.45 |
| EQ-5D-5L utility <sup>c</sup>                                      | 77 | 0.43<br>(0.37)          | 84 | 0.40<br>(0.37)          | -0.03 (-<br>0.14,0.09) | 0.66 | -0.03 (-0.13,0.06)   | 0.49 |
| Cough score, mean (mm) <sup>d</sup>                                | 55 | 44.80<br>(28.76)        | 55 | 49.56<br>(26.77)        | 4.42 (-5.92,<br>14.75) | 0.40 | 0.40                 | 0.86 |
| Leicester Cough Questionnaire, mean (SD) <sup>e</sup>              |    |                         |    |                         |                        |      |                      |      |
| LCQ total                                                          | 53 | 15.9<br>(3.9)           | 46 | 14.3<br>(4.1)           | -1.5<br>(-3.1, 0.04)   | 0.06 | -1.2<br>(-2.4, -0.1) | 0.03 |
| LCQ physical                                                       | 53 | 5.1<br>(1.2)            | 47 | 4.7<br>(1.2)            | -0.4<br>(-0.8, 0.1)    | 0.13 | -0.3<br>(-0.6, 0.1)  | 0.14 |
| LCQ psychol                                                        | 53 | 5.3<br>(1.4)            | 49 | 4.8<br>(1.6)            | -0.5<br>(-1.1, 0.1)    | 0.07 | -0.5<br>(-0.9, -0.1) | 0.02 |
| LCQ Social                                                         | 53 | 5.5<br>(1.5)            | 49 | 5.0<br>(1.5)            | -0.5                   | 0.07 | -0.4                 | 0.04 |

|                                                                   |    |                |    |                |                          |      |                         |      |
|-------------------------------------------------------------------|----|----------------|----|----------------|--------------------------|------|-------------------------|------|
|                                                                   |    |                |    |                | (-1.1, 0.0)              |      | (-0.9, -0.0)            |      |
| King's Brief Interstitial Lung Disease questionnaire <sup>f</sup> |    |                |    |                |                          |      |                         |      |
| Psychol                                                           | 54 | 51.4<br>(16.7) | 55 | 52.3<br>(16.6) | 1.0<br>(-5.3, 7.3)       | 0.76 | -0.4<br>(-5.8, 4.9)     | 0.88 |
| Breathless                                                        | 55 | 35.2<br>(17.6) | 56 | 35.1<br>(15.4) | 0.6<br>(-5.6, 6.8)       | 0.85 | -1.7<br>(-6.6, 3.2)     | 0.50 |
| Chest                                                             | 55 | 62.5<br>(18.8) | 56 | 54.6<br>(21.9) | -8.4<br>(-16.1,<br>-0.8) | 0.03 | -6.9<br>(-13.3,<br>0.4) | 0.04 |
| Total                                                             | 54 | 51.5<br>(11.8) | 55 | 50.8<br>(11.0) | -0.7<br>(-5.0, 3.7)      | 0.77 | -1.6<br>(-5.1, 1.9)     | 0.37 |

<sup>a</sup>This is defined as people who adhered to at least 80% of the study medication. <sup>b</sup>Medical Research Council dyspnea score is a 5 point scale ranging between 1 and 5 (higher values represent increasing breathlessness) a value of 3 represents walking slower than contemporaries or having to stop when walking at own pace, <sup>c</sup>EQ-5D-5L utility ranges from -0.59 to 1 (higher score indicates better health utility) a value of 0.75 represents that the quality of life adjusted years has been reduced by a slight amount. Utilities are calculated by mapping to standard health state valuations. <sup>d</sup>The cough score is a cough severity visual analogue score between 0 and 100 (higher score represents greater cough severity) a value of 40 represents coughing is two-fifths of their maximum perceived cough severity. <sup>e</sup>The Leicester Cough Questionnaire is a cough related quality of life score and ranges from 3 to 21 - domain scores range from 1 to 7 - (higher values represent better cough related quality of life) a value of 15 suggests a cough that has affected life activities a little bit of the time over the preceding 2 weeks. It is calculated as the sum of the individual domains. <sup>f</sup>The King's Brief Interstitial Lung Disease questionnaire total and domain scores range between 0 and 100 (higher values represent better health status) a value of 50

suggest that IPF has affect life activities some of the time over the last 2 weeks. It is calculated using the logit-scoring method. There data was incomplete for some patients as they did not complete the questionnaires or attend for lung function assessments

n = number, SD = standard deviation, CI = confidence interval, MRC = medical research council, IQR = inter-quartile range, psychol: psychological FVC = forced vital capacity, FEV1 = forced expiratory volume in 1 second, DLCO = diffusing capacity of the lung for carbon monoxide. L: Liters, mmol/min/KPa: millimoles per minute per kilopascal %: percent

eTable 4

Modified per-protocol analysis<sup>a</sup> of the lung function and questionnaire outcomes at 12 months

| Outcome                  | Co-trimoxazole |                | Placebo |                | Unadjusted                  |             | Adjusted                    |             |
|--------------------------|----------------|----------------|---------|----------------|-----------------------------|-------------|-----------------------------|-------------|
|                          | N              | Mean<br>(SD)   | N       | Mean<br>(SD)   | Mean difference<br>(95% CI) | p-<br>value | Mean difference<br>(95% CI) | p-<br>value |
| Lung Function            |                |                |         |                |                             |             |                             |             |
| Absolute                 |                |                |         |                |                             |             |                             |             |
| FVC<br>(L)               | 32             | 2.23<br>(0.51) | 48      | 2.26<br>(0.53) | 0.03 (-0.21 –<br>0.26)      | 0.83        | 0.06 (-0.05 – 0.17)         | 0.30        |
| FEV1<br>(L)              | 32             | 1.84<br>(0.43) | 48      | 1.89<br>(0.43) | 0.05 (-0.14 –<br>0.25)      | 0.58        | 0.05 (-0.05 – 0.15)         | 0.70        |
| DLCO<br>(mmol/L/K<br>pa) | 27             | 3.71<br>(2.19) | 40      | 3.69<br>(1.47) | 0.01 (-0.86 –<br>0.87)      | 0.99        | 0.36 (-0.43 – 1.14)         | 0.37        |
| Percent predicted        |                |                |         |                |                             |             |                             |             |
| FVC<br>(%)               | 32             | 52.5<br>(8.5)  | 48      | 54.0<br>(9.6)  | 1.5 (-2.6 – 5.6)            | 0.47        | 1.2 (-1.5 – 3.8)            | 0.39        |
| FEV1<br>(%)              | 32             | 56.2<br>(9.6)  | 48      | 59.2<br>(11.2) | 3.2 (-1.5 – 7.9)            | 0.18        | 1.6 (-1.4 – 4.7)            | 0.29        |
| DLCO<br>(%)              | 27             | 41.4<br>(21.3) | 40      | 42.2(1<br>4.8) | 1.3 (-7.4 – 9.9)            | 0.77        | 5.3 (-3.0 – 13.6)           | 0.21        |

|                                                                               |    |                   |    |                   |                       |      |                       |      |
|-------------------------------------------------------------------------------|----|-------------------|----|-------------------|-----------------------|------|-----------------------|------|
| <sup>b</sup> Medical Research Council dyspnea score Median (IQR) <sup>b</sup> | 38 | 3.0<br>(2.0, 4.0) | 54 | 3.0<br>(2.0, 4.0) |                       | 0.66 |                       | 0.49 |
| EQ5D <sup>c</sup>                                                             | 60 | 0.40<br>(0.37)    | 81 | 0.40<br>(0.37)    | -0.03<br>(-0.14,0.09) | 0.66 | -0.01<br>(-0.12,0.10) | 0.84 |
| Cough score (mm) <sup>d</sup>                                                 | 38 | 43.1<br>(28.4)    | 53 | 49.8<br>(27.2)    | 6.3<br>(-5.3,18.0)    | 0.29 | 2.3<br>(-8.3,12.9)    | 0.67 |
| Leicester Cough Questionnaire, mean (SD) <sup>e</sup>                         |    |                   |    |                   |                       |      |                       |      |
| LCQ total                                                                     | 37 | 15.7<br>(3.8)     | 44 | 14.1<br>(4.1)     | -1.5<br>(-3.2,0.3)    | 0.10 | -1.4<br>(-2.7,-0.1)   | 0.03 |
| LCQ physical                                                                  | 37 | 5.0<br>(1.2)      | 45 | 4.6<br>(1.2)      | -0.4<br>(-0.9,0.2)    | 0.17 | -0.4<br>(-0.8,0.0)    | 0.06 |
| LCQ psychol                                                                   | 37 | 5.4<br>(1.3)      | 46 | 4.8<br>(1.6)      | -0.5<br>(-1.1,0.2)    | 0.14 | -0.5<br>(-1.0,-0.1)   | 0.03 |
| LCQ Social                                                                    | 37 | 5.4<br>(1.5)      | 46 | 4.9<br>(1.5)      | -0.5<br>(-1.1,0.2)    | 0.16 | -0.5<br>(-1.0,0.0)    | 0.05 |
| Kings Brief Interstitial Lung Disease questionnaire <sup>f</sup>              |    |                   |    |                   |                       |      |                       |      |
| Psychol                                                                       | 38 | 51.4<br>(16.2)    | 53 | 52.3<br>(16.7)    | 1.0<br>(-6.0,7.9)     | 0.78 | -1.0<br>(-6.9,4.9)    | 0.74 |
| Breathless                                                                    | 38 | 35.3<br>(17.6)    | 54 | 35.0<br>(15.7)    | 0.5<br>(-6.2,7.2)     | 0.89 | -1.0<br>(-6.3,4.4)    | 0.73 |
| Chest                                                                         | 38 | 60.6<br>(19.2)    | 54 | 54.5<br>(22.1)    | -6.8<br>(-15.5,1.9)   | 0.13 | -6.3<br>(-13.8,1.1)   | 0.10 |

|       |    |                |    |                |                    |      |                    |      |
|-------|----|----------------|----|----------------|--------------------|------|--------------------|------|
| Total | 38 | 51.5<br>(11.7) | 53 | 50.8<br>(11.2) | -0.6<br>(-5.4,4.2) | 0.81 | -1.4<br>(-5.3,2.5) | 0.49 |
|-------|----|----------------|----|----------------|--------------------|------|--------------------|------|

Abbreviations: n = number, SD = standard deviation, CI = confidence interval, MRC = medical research council, IQR = inter-quartile range, psychol: psychological FVC = forced vital capacity, FEV1 = forced expiratory volume in 1 second, DLCO = diffusing capacity of the lung for carbon monoxide. L: Liters, mmol/min/KPa: millimoles per minute per kilopascal %: percent

<sup>a</sup>This is defined as people who adhered to at least 80% of the high dose regimen. <sup>b</sup>Medical Research Council dyspnea score is a 5 point scale ranging between 1 and 5 (higher values represent increasing breathlessness) a value of 3 represents walking slower than contemporaries or having to stop when walking at own pace, <sup>c</sup>EQ-5D-5L utility ranges from -0.59 to 1 (higher score indicates better health utility) a value of 0.75 represents that the quality of life adjusted years has been reduced by a slight amount. Utilities are calculated by mapping to standard health state valuations. <sup>d</sup>The cough score is a cough severity visual analogue score between 0 and 100 (higher score represents greater cough severity) a value of 40 represents coughing is two fifths as much as it could possibly be. <sup>e</sup>The Leicester Cough Questionnaire is a cough related quality of life score and ranges from 3 to 21 - domain scores range from 1 to 7 - (higher values represent better cough related quality of life) a value of 15 suggests a cough that has affected life activities a little bit of the time over the preceding 2 weeks. It is calculated as the sum of the individual domains. <sup>f</sup>The King's Brief Interstitial Lung Disease questionnaire total and domain scores range between 0 and 100 (higher values represent better health status) a value of 50 suggest that IPF has affect life activities some of the time over the last 2 weeks. It is calculated using the logit-scoring method. There data was incomplete for some patients as they did not complete the questionnaires or attend for lung function assessments

eTable 5 Cough score over time by randomisation arm

|                    | Co-trimoxazole |     | Placebo     |     | Difference         | p-value<br>(Bonferoni<br>corrected) |
|--------------------|----------------|-----|-------------|-----|--------------------|-------------------------------------|
|                    | Mean (SD)      | n   | Mean (SD)   | n   |                    |                                     |
| 3 months           | 43.7 (26.8)    | 122 | 44.2 (28.3) | 139 | 1.0 (-8.2,10.2)    | 1.00                                |
| 6 months           | 40.1 (26.2)    | 106 | 47.5 (28.7) | 116 | 6.8 (-3.0,16.6)    | 0.44                                |
| 12 months          | 44.7 (27.0)    | 72  | 49.7 (26.7) | 84  | 4.5 (-6.8,15.7)    | 1.00                                |
| 18 months          | 46.0 (29.7)    | 42  | 58.4 (25.0) | 51  | 15.0 (1.2,28.8)    | 0.02                                |
| 24 months          | 39.7 (27.3)    | 22  | 48.6 (25.7) | 30  | 11.9 (-5.9,29.6)   | 0.51                                |
| 30 months          | 43.6 (27.2)    | 13  | 54.6 (26.8) | 12  | 10.6 (-13.9,35.0)  | 1.00                                |
| 36 months          | 75.0 (7.1)     | 2   | 41.3 (38.4) | 4   | -21.1 (-71.8,29.6) | 1.00                                |
| Overall Difference |                |     |             |     | 5.7 (0.1,11.2)     | 0.04                                |

n = number, SD = standard deviation

eTable 6 Adverse events

| Adverse event                                           | Co-<br>trimoxazole:<br>total events | Co-<br>trimoxazole<br>number of<br>people with<br>at least one<br>event (%) | Placebo:<br>number of<br>events | Placebo:<br>number of<br>people<br>with at<br>least one<br>event (%) |
|---------------------------------------------------------|-------------------------------------|-----------------------------------------------------------------------------|---------------------------------|----------------------------------------------------------------------|
|                                                         |                                     | N = 169                                                                     |                                 | N = 172                                                              |
| Blood and lymphatic system disorders                    | 3                                   | 3 (2%)                                                                      | 3                               | 3 (2%)                                                               |
| Cardiac disorders                                       | 6                                   | 6 (4%)                                                                      | 4                               | 3 (2%)                                                               |
| Ear and labyrinth disorders                             | 3                                   | 2 (1%)                                                                      | 0                               | 0                                                                    |
| Eye disorders                                           | 5                                   | 5 (3%)                                                                      | 6                               | 5 (3%)                                                               |
| Gastrointestinal disorders                              | 216                                 | 92 (54%)                                                                    | 224                             | 81 (47%)                                                             |
| - Nausea                                                | 89                                  | 53 (31%)                                                                    | 67                              | 42 (24%)                                                             |
| - Diarrhoea                                             | 52                                  | 36 (21%)                                                                    | 84                              | 53 (31%)                                                             |
| - Vomiting                                              | 28                                  | 20 (12%)                                                                    | 20                              | 16 (9%)                                                              |
| - Constipation                                          | 11                                  | 10 (6%)                                                                     | 5                               | 5 (3%)                                                               |
| General disorders and administration<br>site conditions | 36                                  | 25 (15%)                                                                    | 20                              | 17 (10%)                                                             |
| - Fatigue                                               | 15                                  | 15 (9%)                                                                     | 11                              | 10 (6%)                                                              |
| - Chest pain                                            | 8                                   | 7 (4%)                                                                      | 6                               | 5 (3%)                                                               |
| - Edema peripheral                                      | 5                                   | 4 (2%)                                                                      | 0                               | 0                                                                    |
| Immune system disorders                                 | 1                                   | 1 (1%)                                                                      | 1                               | 1(1%)                                                                |
| Infections and infestations                             | 110                                 | 57 (33%)                                                                    | 127                             | 70 (41%)                                                             |
| - Lower Respiratory Tract<br>Infection                  | 63                                  | 35 (20%)                                                                    | 66                              | 42 (24%)                                                             |
| Injury, poisoning and procedural<br>complications       | 7                                   | 5 (3%)                                                                      | 10                              | 10 (6%)0                                                             |
| Investigations                                          | 44                                  | 34 (20%)                                                                    | 22                              | 16 (9%)                                                              |

|                                                                      |     |           |     |           |
|----------------------------------------------------------------------|-----|-----------|-----|-----------|
| - Weight decrease                                                    | 24  | 21 (12%)  | 16  | 14 (8%)   |
| Metabolism and nutrition disorders                                   | 57  | 38 (22%)  | 27  | 19 (11%)  |
| - Decreased appetite                                                 | 26  | 18 (11%)  | 9   | 6 (3%)    |
| - Hyperkalemia                                                       | 24  | 18 (11%)  | 14  | 11 (6%)   |
| Musculoskeletal and connective tissue disorders                      | 21  | 18 (11%)  | 20  | 14 (8%)   |
| Neoplasm/s benign, malignant and unspecified (incl cysts and polyps) | 3   | 2 (1%)    | 1   | 1 (1%)    |
| Nervous system disorders                                             | 41  | 29 (17%)  | 32  | 24 (14%)  |
| - Headache                                                           | 22  | 16 (9%)   | 14  | 11 (6%)   |
| Psychiatric disorders                                                | 5   | 4 (2%)    | 2   | 2 (1%)    |
| Renal and urinary disorders                                          | 14  | 12 (7%)   | 7   | 7 (4%)    |
| Reproductive system and breast disorders                             | 0   | 0         | 2   | 2 (2%)    |
| Respiratory, thoracic and mediastinal disorders                      | 77  | 46 (27%)  | 95  | 61 (35%)  |
| - Cough                                                              | 27  | 23 (14%)  | 33  | 30 (17%)  |
| - Dyspnoea                                                           | 31  | 25 (15%)  | 34  | 30 (17%)  |
| Skin and subcutaneous tissue disorders                               | 46  | 29 (17%)  | 30  | 23 (13%)  |
| - Rash                                                               | 31  | 23 (14%)  | 20  | 15 (9%)   |
| Surgical and medical procedures                                      | 1   | 1 (1%)    | 2   | 2 (1%)    |
| Vascular disorders                                                   | 0   | 0         | 5   | 3 (2%)    |
| Total adverse events                                                 | 696 |           | 640 |           |
| Number with at least one adverse event                               |     | 146 (86%) |     | 142 (83%) |
| Number with at least two adverse events                              |     | 119 (70%) |     | 121 (70%) |

Adverse events were captured at each study visit and coded using Medical Dictionary for Regulatory Activities (MedDRA) terms. Data are presented where an event occurred on at least 10 occasions in either treatment group. Hyperkalaemia was defined as a potassium > 5.0 mmol/l. Investigations include abnormal laboratory results and weight change.

eTable 7 Summary of safety blood measures at 12 months

|                                                | Co-trimoxazole |    | Placebo      |    | p-value |
|------------------------------------------------|----------------|----|--------------|----|---------|
|                                                | Mean (SD)      | N  | Mean (SD)    | N  |         |
| White cell count x 10 <sup>9</sup> /litre      | 8.9 (2.3)      | 68 | 8.4 (1.9)    | 87 | 0.23    |
| Haemoglobin (HB) g/dL                          | 142.8 (13.2)   | 68 | 146.5 (14.0) | 87 | 0.10    |
| Red Cell Count (RCC) x 10 <sup>12</sup> /litre | 4.7 (0.5)      | 67 | 4.8 (0.4)    | 86 | 0.09    |
| Mean cell volume (MCV) fL                      | 92.7 (6.9)     | 68 | 92.0 (5.6)   | 86 | 0.48    |
| Mean cell haemoglobin (MCH) picograms          | 30.9 (2.8)     | 68 | 30.7 (2.1)   | 86 | 0.66    |
| Haematocrit (HCT) (%)                          | 0.4 (0.0)      | 67 | 0.4 (0.0)    | 83 | 0.09    |
| Neutrophils x 10 <sup>9</sup> / litre          | 5.99 (1.94)    | 67 | 5.65 (1.65)  | 86 | 0.24    |
| Lymphocytes x 10 <sup>9</sup> / litre          | 1.70 (0.75)    | 68 | 1.78 (0.69)  | 86 | 0.50    |
| Eosinophils x 10 <sup>9</sup> / litre          | 0.29 (0.15)    | 68 | 0.25 (0.15)  | 86 | 0.11    |
| Basophils x 10 <sup>9</sup> / litre            | 0.06 (0.04)    | 67 | 0.05 (0.04)  | 86 | 0.24    |
| Monocytes x 10 <sup>9</sup> / litre            | 0.71 (0.22)    | 68 | 0.68 (0.21)  | 86 | 0.40    |
| Platelets x 10 <sup>9</sup> / litre            | 242.8 (65.4)   | 68 | 238.7 (67.0) | 87 | 0.71    |
| Sodium (Na) mmol/litre                         | 138.2 (2.8)    | 68 | 138.7 (2.7)  | 88 | 0.22    |
| Potassium (K) mmol/litre                       | 4.4 (0.5)      | 68 | 4.4 (0.4)    | 88 | 0.61    |
| Urea mmol/litre                                | 6.1 (2.4)      | 68 | 5.6 (1.7)    | 88 | 0.11    |
| Creatinine µmol/litre                          | 96.3 (34.7)    | 68 | 83.6 (21.1)  | 88 | 0.005   |
| Bilirubin µmol/litre                           | 8.2 (3.8)      | 65 | 9.6 (5.0)    | 86 | 0.06    |
| Alanine aminotransferase: IU/litre             | 22.9 (12.6)    | 68 | 21.3 (10.3)  | 85 | 0.39    |
| Alkaline phosphatase IU/litre                  | 95.5 (53.0)    | 68 | 88.1 (29.0)  | 88 | 0.27    |
| Albumin g/dL                                   | 39.8 (3.8)     | 67 | 39.3 (4.6)   | 88 | 0.52    |
| Total protein g/dL                             | 74.0 (6.8)     | 56 | 73.2 (6.1)   | 75 | 0.46    |
| Globulin g/dL                                  | 30.2 (9.9)     | 31 | 34.0 (6.5)   | 39 | 0.06    |

SD = standard deviation, n = number, g/dL = grams per decilitre, fL = femtoliters, mmol = millimole, µmol = micromole, IU = international unit
