# Supplementary material
Source: PubMed Central journal article supplement (PMC7724556)
Supplement: jama-e2022960-s004.pdf [file jama-e2022960-s004.pdf]

## Data Sharing Statement

### Data

**Data available:** Yes

**Data types:** Data dictionary

**How to access data:** [a.m.wilson@uea.ac.uk](mailto:a.m.wilson@uea.ac.uk)

**When available:** With publication

### Supporting Documents

**Document types:** None

### Additional Information

**Who can access the data:** [a.m.wilson@uea.ac.uk](mailto:a.m.wilson@uea.ac.uk)

**Types of analyses:** any purpose

**Mechanisms of data availability:** All data requests should be submitted to the corresponding author for consideration. Access to available anonymised individual patient data, with appropriate data dictionary, may be granted following review and appropriate data sharing agreements assuming there is appropriate acknowledgement of the data source. There are no restriction on the analyses that may be undertaken using the data.
